# Supplementary material
Source: publisher figshare collection journal article supplement (https://acs.figshare.com/ndownloader/files/5102545)

## Supporting Information

Dinuclear Citrato Oxomolybdates in Acidic and Reduced Forms in Relevance to the Potential  
Function of Hydroxycarboxylic Acids in FeMo-cofactor of Nitrogenase

Zhao-Hui Zhou\*, Yuan-Fu Deng, Ze-Xing Cao, Rong-Hua Zhang, Yuan L. Chow

Figure S2  $^{13}\text{C}$ -NMR spectra for  $\text{K}[(\text{MoO}_2)_2(\text{OH})(\text{H}_2\text{cit})_2]\cdot 4\text{H}_2\text{O}$  (**1**) after three month

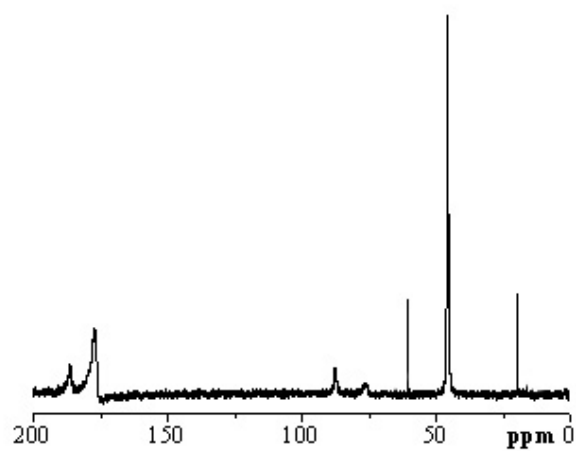

Supplement: Supplementary file 1 [file 5102545]
